# Supplementary material for: Acotaciones a un debate italiano sobre la democracia y socialismo
Source: MDPI journal article supplement (doi:10.3390/cancers13246290), 1977-01-01
Supplement: s1 [file s1]

---

Patient: **Last name, First name, Date of birth**

---

**1. Is the patient still alive?**

☐ Yes → Date of the last medical visit:

☐ No → Date of death:

Cause of death:

**2. Did the patient clinically benefit from the DOTATOC therapy?**

☐ no benefit      ☐ minor benefit      ☐ moderate benefit      ☐ major benefit

**3. Did the patient receive any somatostatin analogues after completion of DOTATOC therapy?**

☐ Yes      ☐ No

**Thank you for your efforts and collaboration.**

**Supplementary Figure 1.** Standardized questionnaire for the treating physicians used for the clinical response assessment.
